# Supplementary material for: Wolbachia-Mitochondrial DNA Associations in Transitional Populations of Rhagoletis cerasi
Source: MDPI journal article supplement (doi:10.3390/insects11100675), 2020-10-05
Supplement: s1 [file s1]

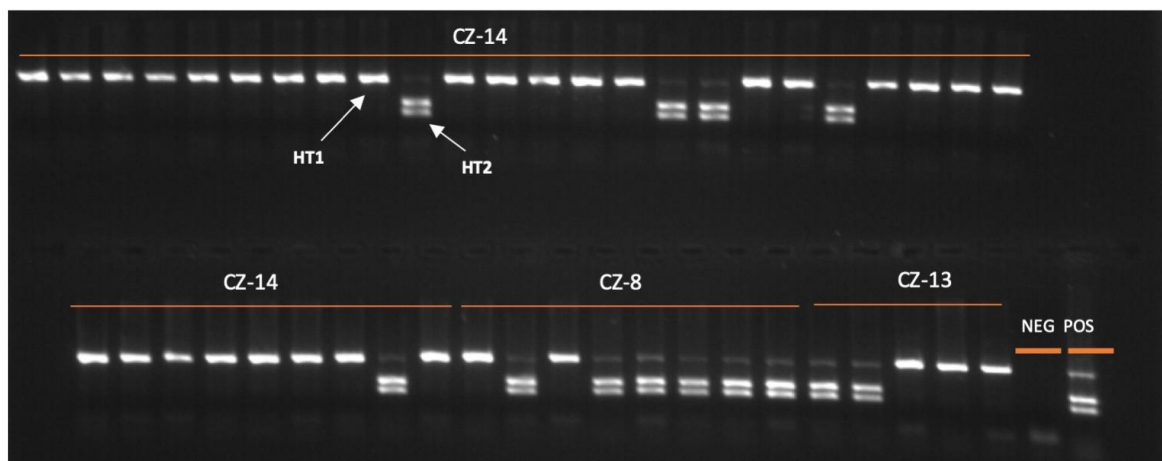

**Figure S1.** Electrophoresis gel showing an example of HT1 and HT2 digestion with restriction enzyme *HaeIII*.
